# Supplementary material
Source: PubMed Central journal article supplement (PMC2156091)

### 5'UTR

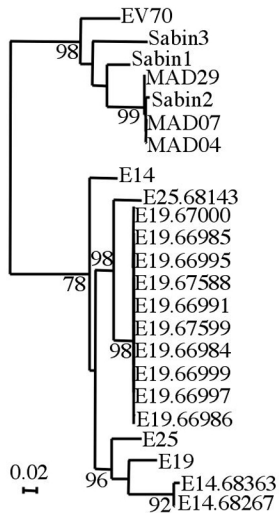

### VP1

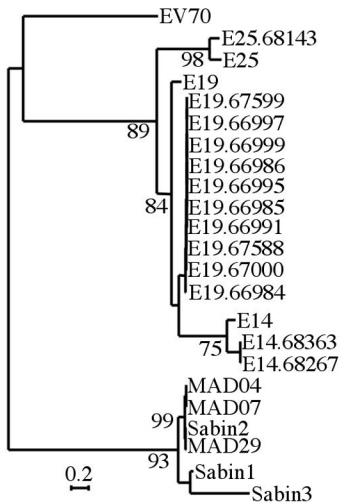

### 2C

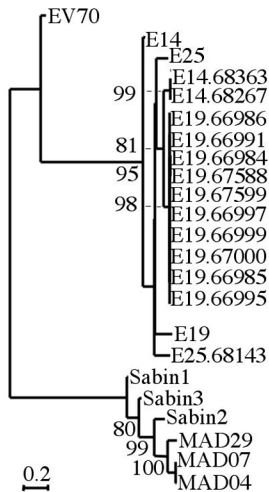

### 3D

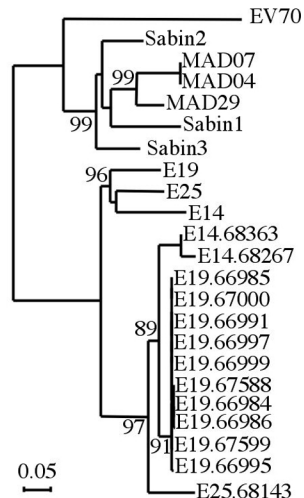

Supplement: ppat.0030191.sg001.pdf [file ppat.0030191.sg001.pdf]
